# Supplementary material
Source: MDPI journal article supplement (https://www.mdpi.com/2071-1050/15/1/535)
Supplement: s1 [file s1 › sustainability-1915586-supplementary.pdf]

## Supplementary Materials

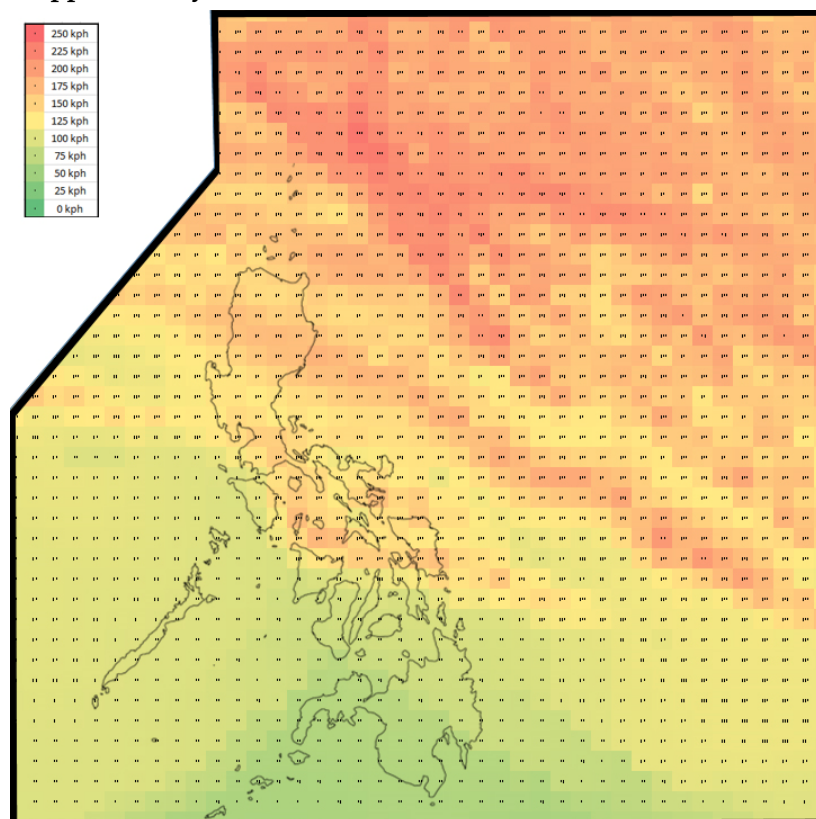

**Figure S1.** Maximum Regional Cyclonic Winds – Southwest Monsoon Season (2000-2010).

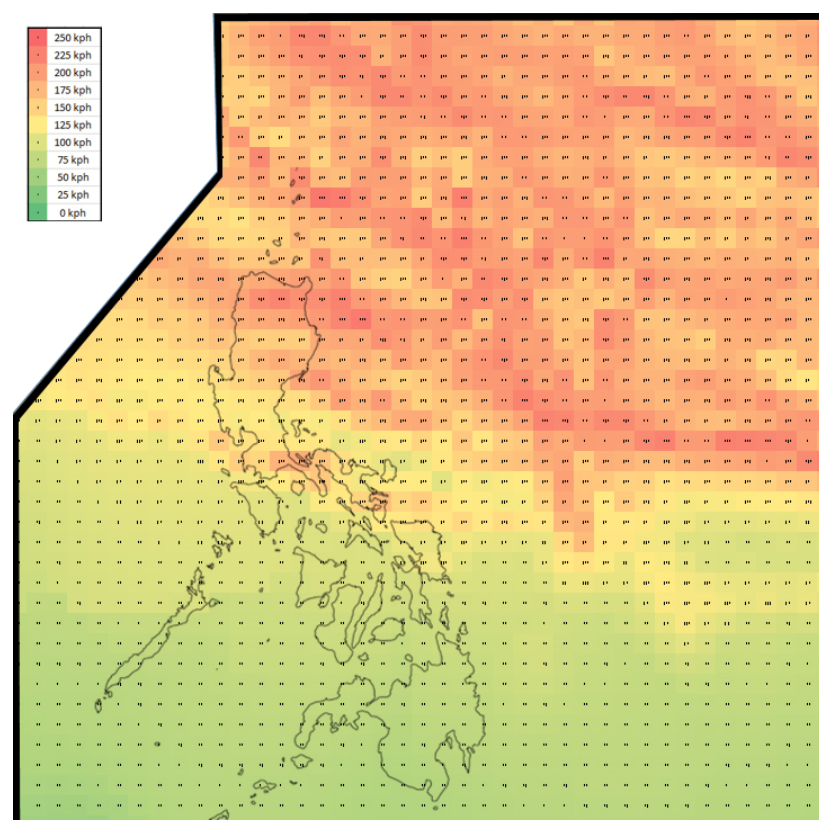

**Figure S2.** Maximum Regional Cyclonic Winds – Southwest Monsoon Season (2011-2021).

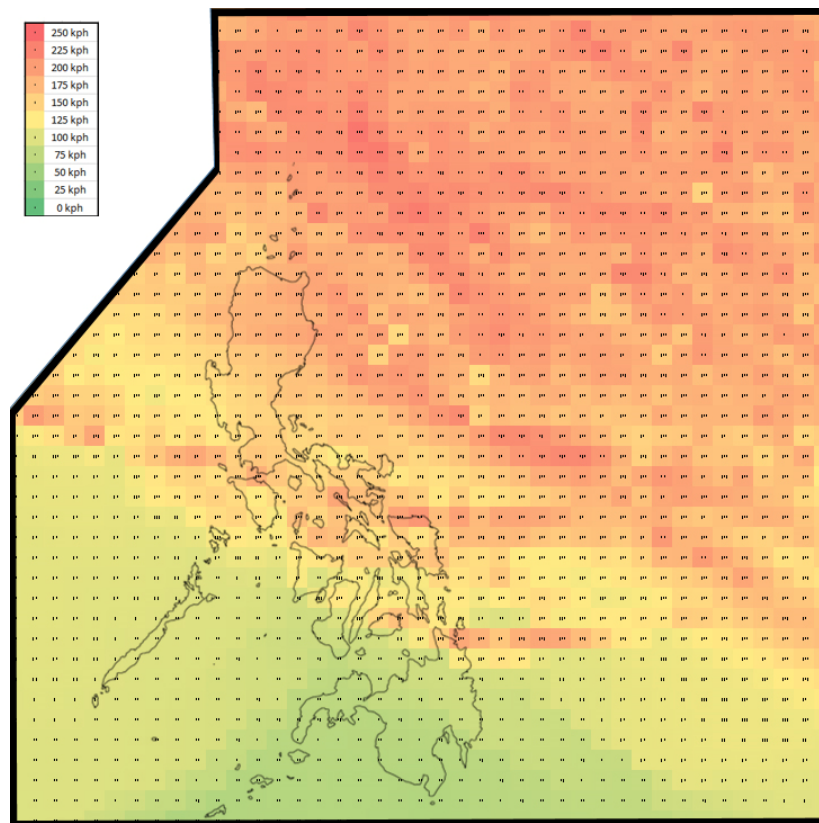

Figure S3. Maximum Regional Cyclonic Winds – Southwest Monsoon Season (1977-2010).

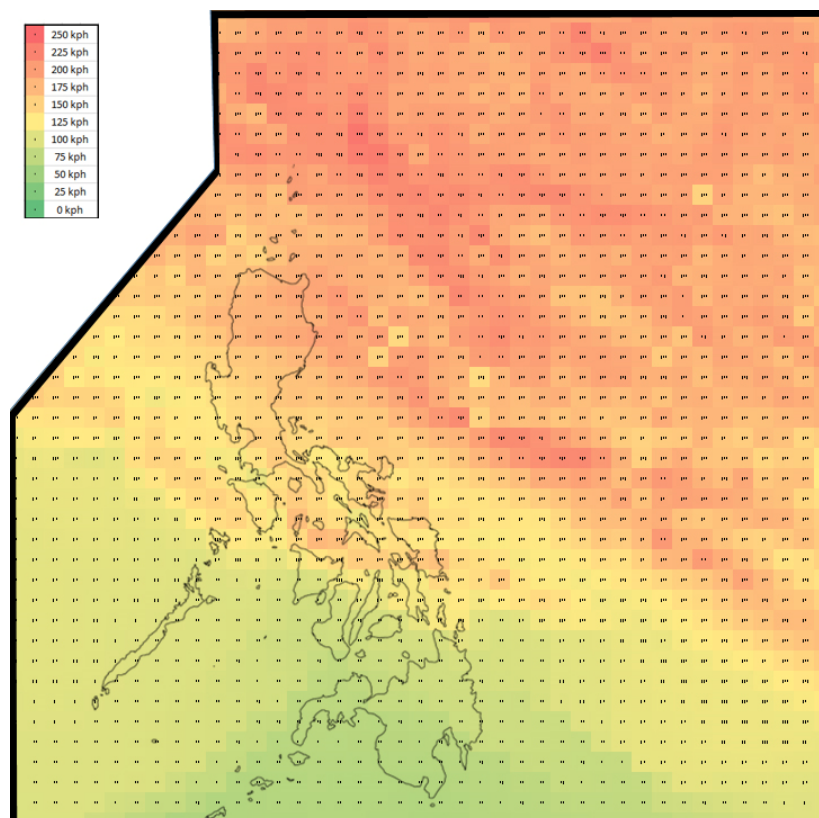

Figure S4. Maximum Regional Cyclonic Winds – Southwest Monsoon Season (1988-2010).

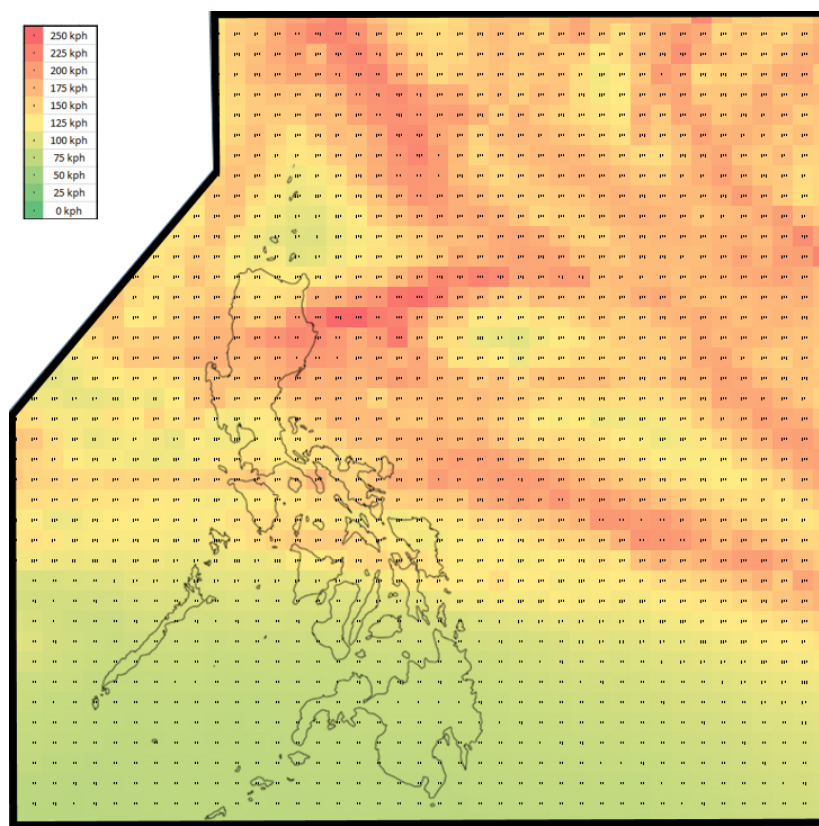

Figure S5. Maximum Regional Cyclonic Winds – Northeast Monsoon Season (2000-2010).

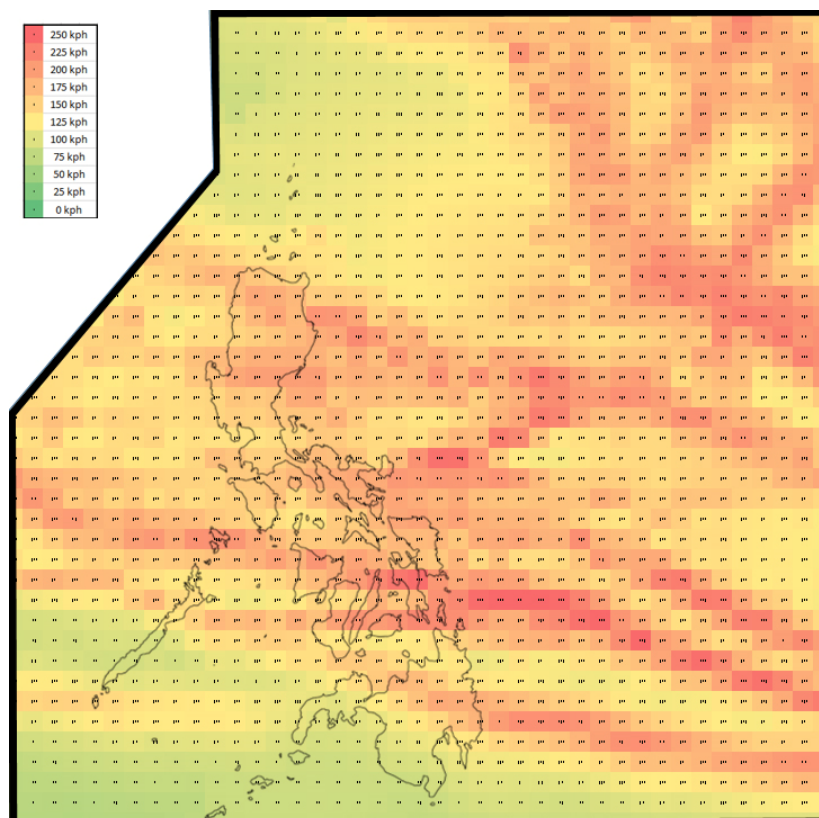

Figure S6. Maximum Regional Cyclonic Winds – Northeast Monsoon Season (2011-2021).

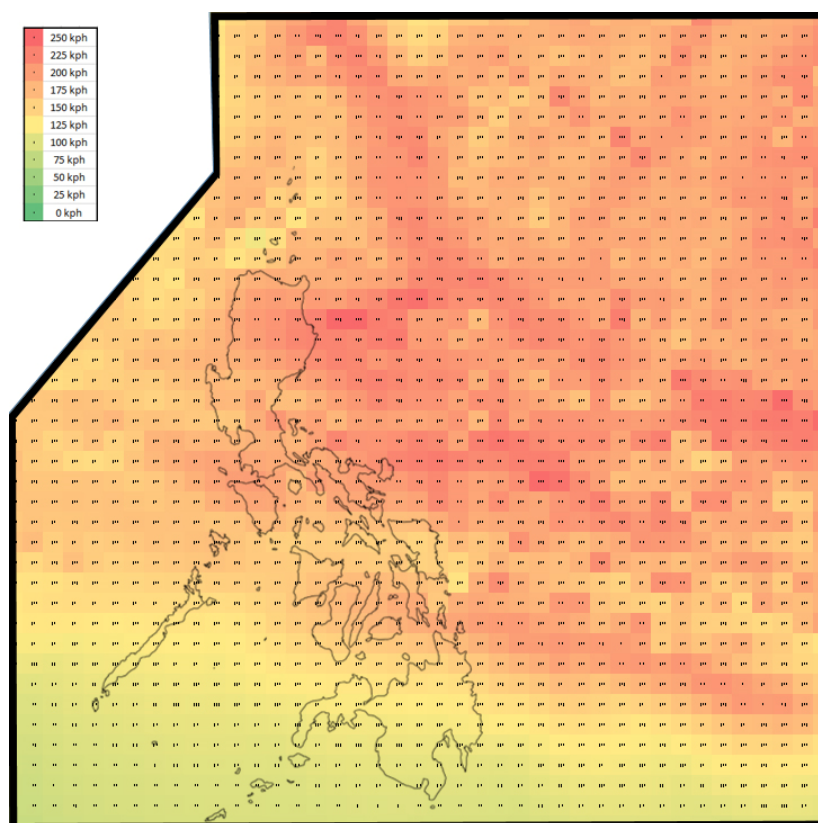

Figure S7. Maximum Regional Cyclonic Winds – Northeast Monsoon Season (1977-2010).

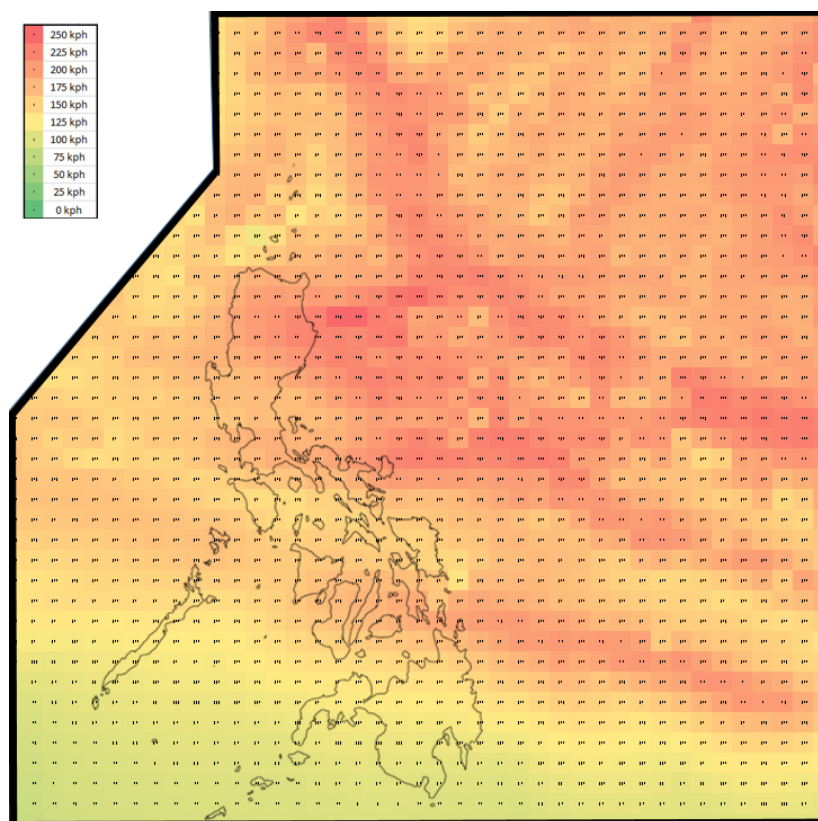

Figure S8. Maximum Regional Cyclonic Winds – Northeast Monsoon Season (1988-2010).

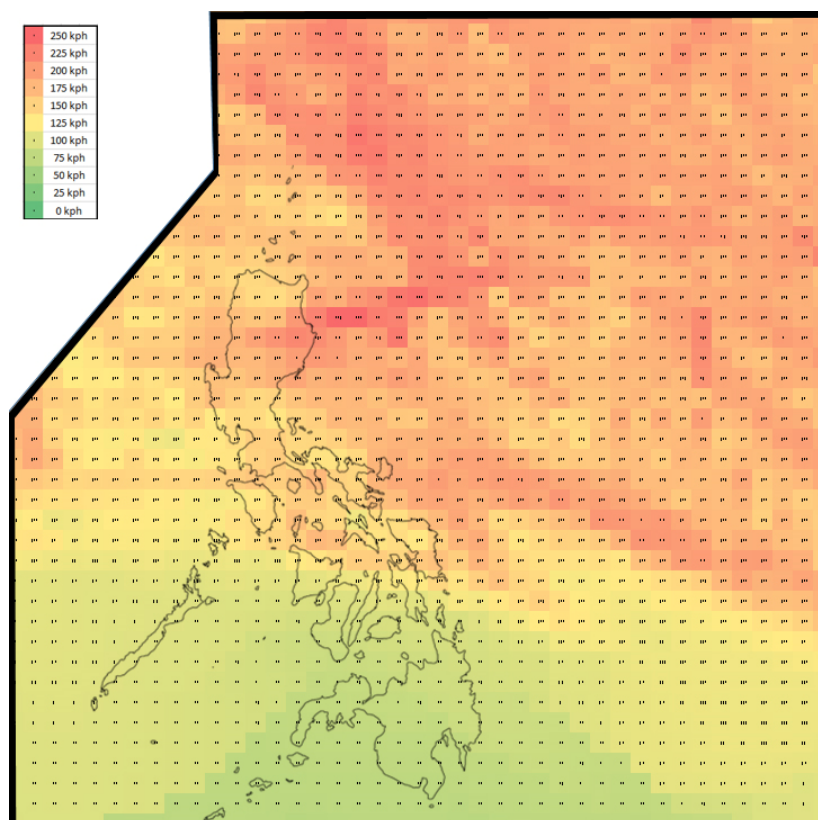

Figure S9. Maximum Regional Cyclonic Winds – Year-round (2000-2010).

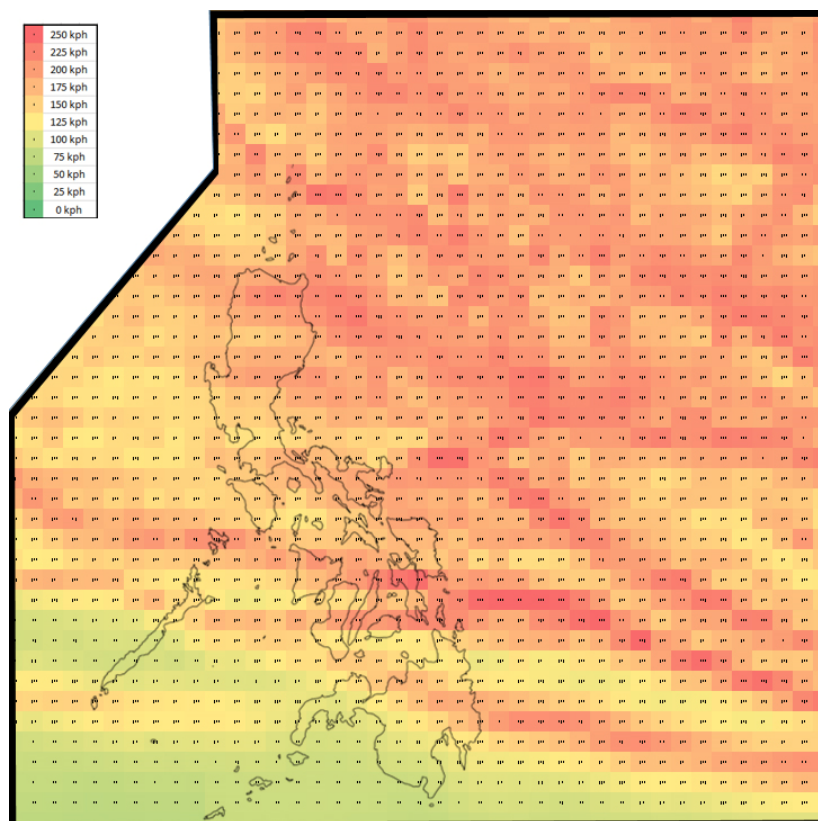

Figure S10. Maximum Regional Cyclonic Winds – Year-round (2011-2021).

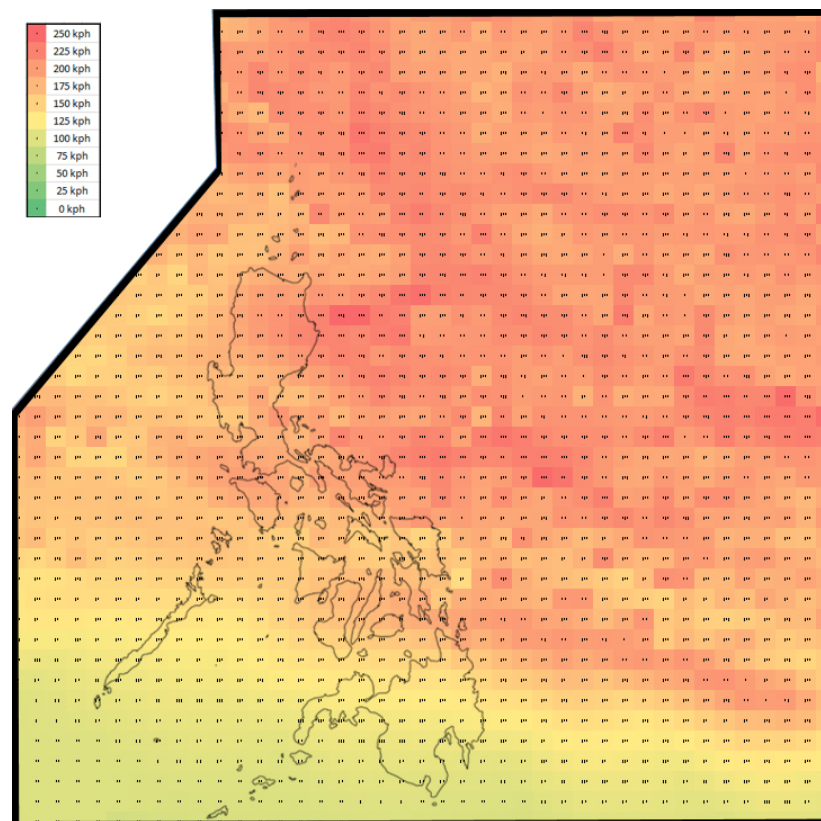

Figure S11. Maximum Regional Cyclonic Winds – Year-round (1977-2010).

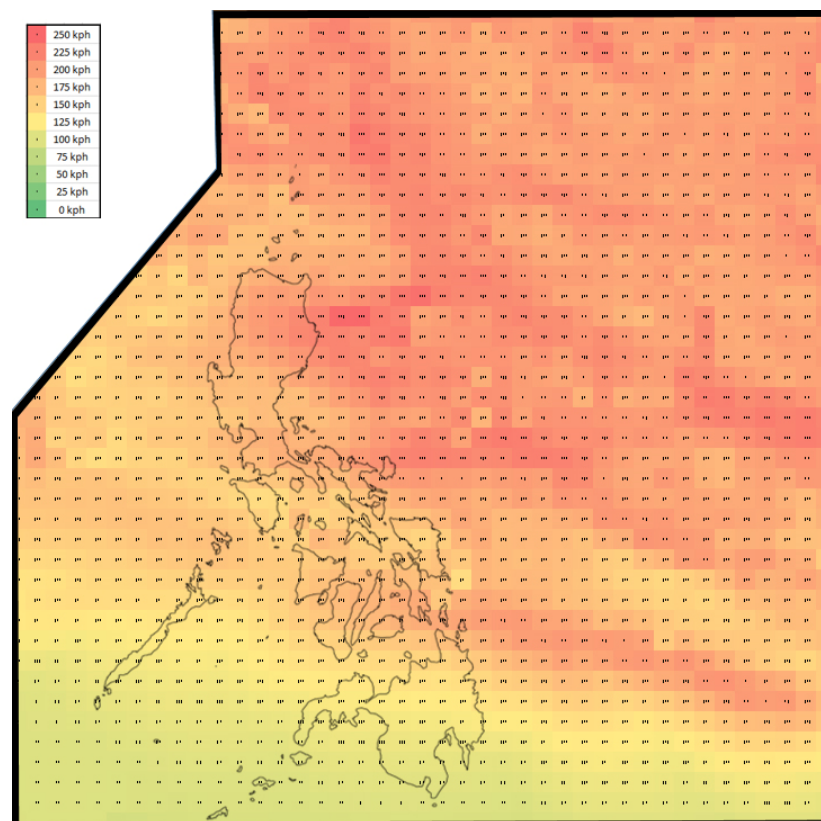

Figure S12. Maximum Regional Cyclonic Winds – Year-round (1988-2010).

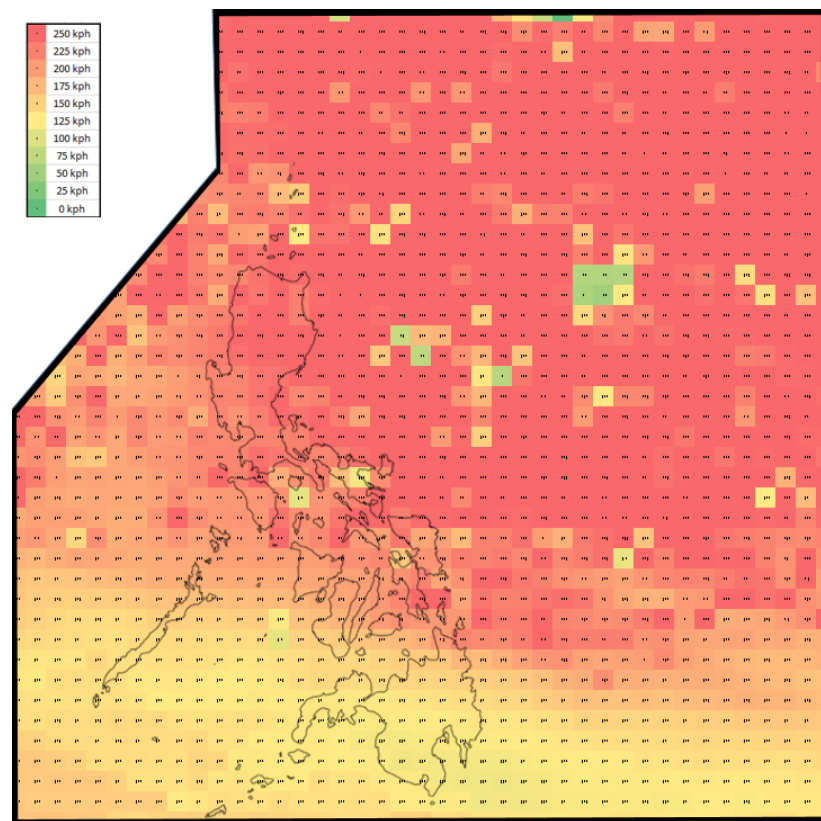

Figure S13. 100-year winds (1977-2010).

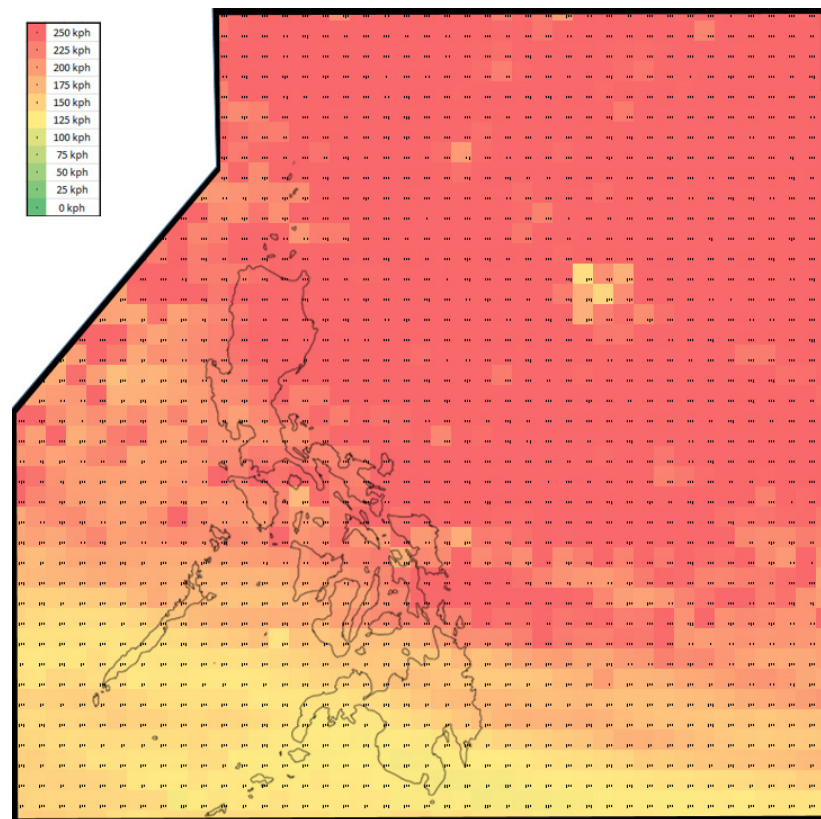

Figure S14. 100-year winds (1977-2021).

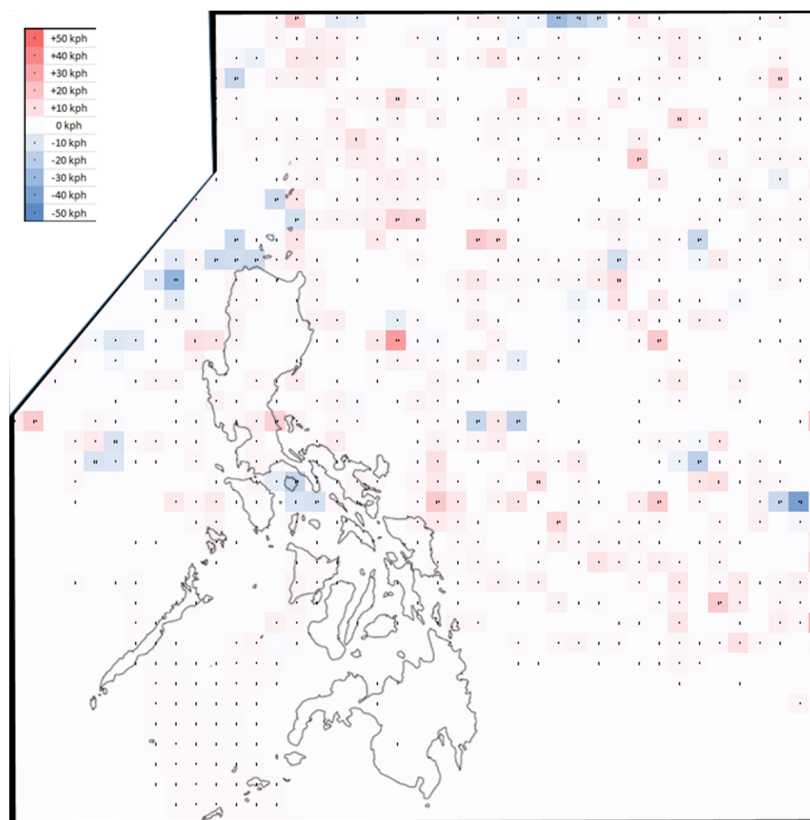

Figure S15. Difference between quarter-hourly and hourly interpolation – Yearly (1977-2010).

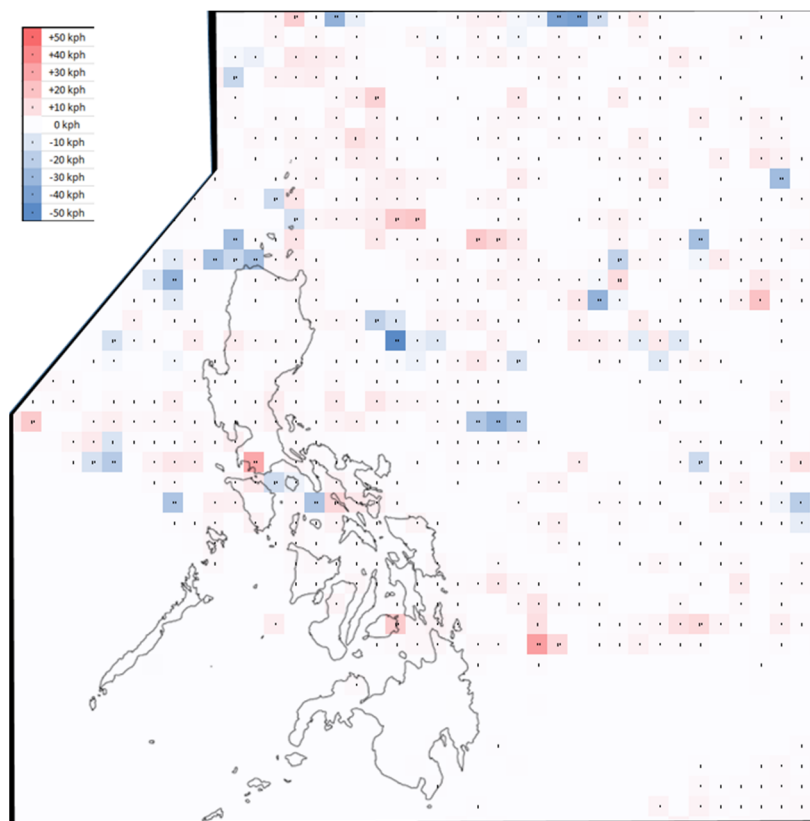

Figure S16. Difference between quarter-hourly and hourly interpolation – SW Monsoon Season (1977-2010).

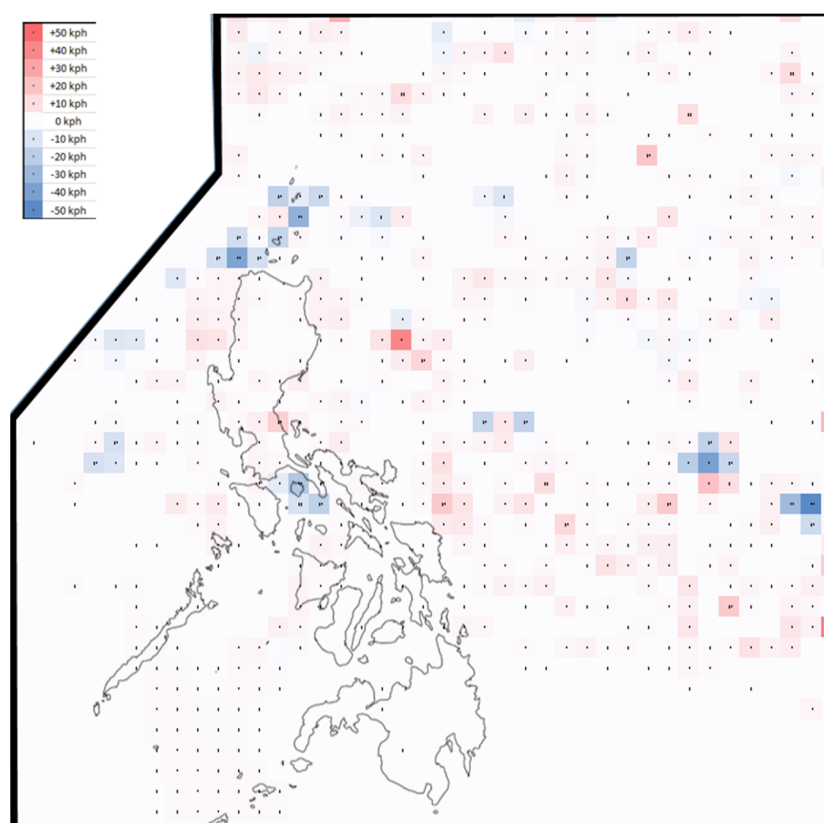

**Figure S17.** Difference between quarter-hourly and hourly interpolation – NE Monsoon Season (1977-2010).
